# Supplementary material for: The rate of high ovarian response in women identified at risk by a high serum AMH level is influenced by the type of gonadotropin
Source: PubMed Central journal article supplement — Gynecol Endocrinol. 2014 Feb 27;30(6):444–50. doi: 10.3109/09513590.2014.892066 (PMC4059219; doi:10.3109/09513590.2014.892066), 2014-02-27
Supplement: GYE-30-444-s1.pdf [file GYE-30-444-s1.pdf]

Supplemental Table I. Logistic regression analysis of live birth rate adjusting for baseline characteristics or end-of-stimulation variables.

| Variables                                                                      | Overall population of potential high-responders<br>( <i>n</i> = 343) |                      |
|--------------------------------------------------------------------------------|----------------------------------------------------------------------|----------------------|
|                                                                                | OR [95% CI]                                                          | P-value <sup>a</sup> |
| Adjusting for type of stimulation protocol                                     |                                                                      |                      |
| Antagonist protocol vs. long agonist protocol                                  | 1.11 [0.69; 1.80]                                                    | 0.666                |
| HP-hMG vs. rFSH                                                                | 1.85 [1.14; 2.99]                                                    | 0.012                |
| Adjusting for age                                                              |                                                                      |                      |
| Age (years)                                                                    | 1.00 [0.92; 1.09]                                                    | 0.975                |
| HP-hMG vs. rFSH                                                                | 1.84 [1.14; 2.98]                                                    | 0.013                |
| Adjusting for BMI                                                              |                                                                      |                      |
| BMI (kg/m <sup>2</sup> )                                                       | 1.03 [0.92; 1.15]                                                    | 0.579                |
| HP-hMG vs. rFSH                                                                | 1.79 [1.10; 2.92]                                                    | 0.020                |
| Adjusting for menstrual cycle length                                           |                                                                      |                      |
| Cycle length (days)                                                            | 1.05 [0.92; 1.19]                                                    | 0.500                |
| HP-hMG vs. rFSH                                                                | 1.84 [1.14; 2.98]                                                    | 0.013                |
| Adjusting for first treatment cycle                                            |                                                                      |                      |
| First treatment cycle                                                          | 1.09 [0.65; 1.85]                                                    | 0.737                |
| HP-hMG vs. rFSH                                                                | 1.85 [1.14; 2.99]                                                    | 0.012                |
| Adjusting for total number of follicles on stimulation day 1                   |                                                                      |                      |
| Total number of follicles                                                      | 0.99 [0.96; 1.02]                                                    | 0.435                |
| HP-hMG vs. rFSH                                                                | 1.89 [1.16; 3.07]                                                    | 0.010                |
| Adjusting for FSH on stimulation day 1                                         |                                                                      |                      |
| FSH (IU/l)                                                                     | 1.10 [1.00; 1.21]                                                    | 0.060                |
| HP-hMG vs. rFSH                                                                | 1.89 [1.16; 3.06]                                                    | 0.010                |
| Adjusting for estradiol at end-of-stimulation                                  |                                                                      |                      |
| Estradiol (nmol/l)                                                             | 0.99 [0.96; 1.03]                                                    | 0.716                |
| HP-hMG vs. rFSH                                                                | 1.85 [1.14; 3.01]                                                    | 0.013                |
| Adjusting for progesterone at end-of-stimulation                               |                                                                      |                      |
| Progesterone (nmol/l)                                                          | 0.84 [0.71; 0.99]                                                    | 0.042                |
| HP-hMG vs. rFSH                                                                | 1.76 [1.08; 2.87]                                                    | 0.024                |
| Adjusting for progesterone/estradiol at end-of-stimulation                     |                                                                      |                      |
| Progesterone/estradiol                                                         | 0.26 [0.07; 0.95]                                                    | 0.042                |
| HP-hMG vs. rFSH                                                                | 1.68 [1.02; 2.75]                                                    | 0.040                |
| Adjusting for number of follicles ≥12 mm at end-of-stimulation                 |                                                                      |                      |
| Follicles ≥12 mm                                                               | 1.05 [0.99; 1.10]                                                    | 0.094                |
| HP-hMG vs. rFSH                                                                | 1.93 [1.18; 3.16]                                                    | 0.008                |
| Adjusting for endometrial thickness at end-of-stimulation                      |                                                                      |                      |
| Endometrial thickness (mm)                                                     | 0.97 [0.85; 1.10]                                                    | 0.653                |
| HP-hMG vs. rFSH                                                                | 1.84 [1.13; 2.99]                                                    | 0.014                |
| Adjusting for number of oocytes retrieved                                      |                                                                      |                      |
| Number of oocytes retrieved                                                    | 1.00 [0.96; 1.04]                                                    | 0.973                |
| HP-hMG vs. rFSH                                                                | 1.85 [1.13; 3.02]                                                    | 0.014                |
| Adjusting for top-quality embryo(s)/good-quality blastocyst(s) on transfer day |                                                                      |                      |
| ≥1 Top-quality embryo/good-quality blastocyst                                  | 2.61 [1.48; 4.61]                                                    | <0.001               |
| HP-hMG vs. rFSH                                                                | 1.80 [1.08; 3.00]                                                    | 0.025                |

OR = odds ratio; CI = Wald confidence interval

<sup>a</sup>Two-sided Wald test of OR = 1 (no effect).
